# Supplementary material for: Understanding the global rise of artemisinin resistance: Insights from over 100,000 Plasmodium falciparum samples
Source: eLife. 2025 Oct 2;14:e105544. doi: 10.7554/eLife.105544 (PMC12490857; doi:10.7554/eLife.105544)
Supplement: Supplementary file 1. — Includes the current list of accepted mutations in each category. [file elife-105544-supp1.xlsx]

## Sheet: Sheet1
Supplementary File 1. Criteria for kelch13 mutations to be classified as candidate or validated markers of artemisinin partial resistance by the WHO (3) and the current list of accepted mutations in each category.
Classification	Criteria	List of current kelch13 mutations
Candidate or associated kelch13 markers of artemisinin partial resistance	1. A statistically significant association (p <0.05) between a kelch13 mutation and clearance half-life >5 hours or day 3 parasitaemia via a chi-squared test or appropriate multivariable regression model on a sample of at least 20 clinical cases	P441L, G449A, C469F, A481V, R515K, P527H, N537I, N537D, G538V, V568G
	OR
	2. Survival of >1% using the RSA0–3h in at least five individual isolates with a given mutation or a statistically significant difference (p <0.05) in the RSA0–3h assay between culture-adapted recombinant isogenic parasite lines, produced using transfection and gene editing techniques, which express a variant allele of kelch13 as compared with the wild-type allele
Validated kelch13 markers of artemisinin partial resistance	Both requirements 1 and 2 are met	F446I, N458Y, C469Y, M476I, Y493H, R539T, I543T, P553L, R561H, P574L, C580Y, R622I, A675V
RSA = ring-stage survival assay. This assay measures the survival of early ring-stage parasites after a six-hour incubation with 700nM dihydroartemisinin. Abnormal RSA result = >1-2% survival compared to control 66 hours after incubation (88).
