# Supplementary material for: Understanding the global rise of artemisinin resistance: Insights from over 100,000 Plasmodium falciparum samples
Source: eLife. 2025 Oct 2;14:e105544. doi: 10.7554/eLife.105544 (PMC12490857; doi:10.7554/eLife.105544)
Supplement: Supplementary file 2. — Ten populations are based on MalariaGEN’s Pf7 geographic/genetic groupings; three additional populations (Southern Africa, North Africa, Western Asia) were defined for samples not fitting existing groupings. “Proportion of population” = percent of samples from each country within a population. “Proportion of total” = percent of total dataset contributed by each country. DRC = Democratic Republic of the Congo. [file elife-105544-supp2.xlsx]

## Sheet: Sheet1
Supplementary File 2. The thirteen populations included in this analysis and the countries and sample sizes within each population. Ten populations match those outlined in MalariaGEN’s Pf7 release and are guided by both geographical and genetic patterns while three extra populations were created for this analysis, for samples which did not fit into pre-existing populations geographically: Souther…
Population	Country	Sample Count	Proportion of Population (%)	Proportion of Total (%)
South America	Brazil	764	16.35	0.68
	Colombia	998	21.36	0.88
	Dominican Republic	8	0.17	0.01
	Ecuador	70	1.5	0.06
	French Guiana	977	20.91	0.87
	Guyana	1204	25.77	1.07
	Haiti	162	3.47	0.14
	Peru	142	3.04	0.13
	Suriname	40	0.86	0.04
	Venezuela	307	6.57	0.27
West Africa	Benin	815	3.26	0.72
	Burkina Faso	2071	8.3	1.83
	Côte d'Ivoire	2296	9.2	2.03
	Cameroon	2183	8.75	1.93
	Cape Verde	39	0.16	0.03
	Gabon	1078	4.32	0.95
	Gambia	1177	4.72	1.04
	Ghana	4374	17.52	3.87
	Guinea	1169	4.68	1.04
	Guinea-Bissau	19	0.08	0.02
	Liberia	437	1.75	0.39
	Mali	3468	13.89	3.07
	Mauritania	75	0.3	0.07
	Niger	649	2.6	0.57
	Nigeria	1899	7.61	1.68
	Sao Tome and Principe	120	0.48	0.11
	Senegal	1862	7.46	1.65
	Sierra Leone	207	0.83	0.18
	Togo	1024	4.1	0.91
Central Africa	Central African Republic	201	1.95	0.18
	Chad	781	7.56	0.69
	Congo	222	2.15	0.2
	DRC	6651	64.39	5.89
	Equatorial Guinea	2474	23.95	2.19
East Africa	Burundi	1	0.01	0
	Comoros	627	5.15	0.56
	Kenya	4265	35.06	3.78
	Madagascar	367	3.02	0.32
	Malawi	506	4.16	0.45
	Rwanda	2154	17.71	1.91
	Somalia	325	2.67	0.29
	Tanzania	3920	32.22	3.47
North Africa	Algeria	2	22.22	0
	Egypt	1	11.11	0
	Libya	6	66.67	0.01
Northeast Africa	Djibouti	9	0.08	0.01
	Eritrea	1563	13.32	1.38
	Ethiopia	732	6.24	0.65
	Saudi Arabia	4	0.03	0
	South Sudan	323	2.75	0.29
	Sudan	1123	9.57	0.99
	Uganda	7752	66.04	6.86
	Yemen	232	1.98	0.21
Southern Africa	Angola	1635	25.72	1.45
	Mozambique	1103	17.35	0.98
	South Africa	2926	46.03	2.59
	Zambia	684	10.76	0.61
	Zimbabwe	9	0.14	0.01
Western Asia	Afghanistan	342	31.46	0.3
	Iran	76	6.99	0.07
	Pakistan	669	61.55	0.59
Eastern South Asia	India	4261	100	3.77
Far-Eastern South Asia	Bangladesh	2485	98.61	2.2
	Nepal	35	1.39	0.03
Western Southeast Asia	China	1139	6.12	1.01
	Myanmar	11868	63.79	10.51
	Thailand	5599	30.09	4.96
Eastern Southeast Asia	Cambodia	6213	44.26	5.5
	Laos	2659	18.94	2.35
	Malaysia	342	2.44	0.3
	Philippines	213	1.52	0.19
	Vietnam	4610	32.84	4.08
Oceania	Indonesia	524	23.93	0.46
	Papua New Guinea	1434	65.48	1.27
	Solomon Islands	164	7.49	0.15
	Vanuatu	68	3.11	0.06
