# Supplementary material for: Understanding the global rise of artemisinin resistance: Insights from over 100,000 Plasmodium falciparum samples
Source: eLife. 2025 Oct 2;14:e105544. doi: 10.7554/eLife.105544 (PMC12490857; doi:10.7554/eLife.105544)
Supplement: Supplementary file 3. — C/V = WHO-classified candidate or validated marker. [file elife-105544-supp3.xlsx]

## Sheet: Sheet1
Supplementary File 3. Number of unique kelch13 propeller mutations across populations. C/V = WHO candidate or validated kelch13 marker associated with partial artemisinin resistance.
Continent	Population	Total Samples	No. Mutations	No. C/V Mutations	% of samples with a mutation	% of samples with a C/V mutation
South America	SA	4672	3	1	0.45	0.41
Africa	AF-W	24962	185	5	2.09	0.06
	AF-C	10329	96	7	1.98	0.12
	AF-N	9	0	0	0	0
	AF-NE	11738	81	7	10.39	8.08
	AF-E	12165	108	11	3.81	1.45
	AF-S	6357	42	4	0.98	0.09
Asia	AS-W	1087	5	0	0.64	0
	AS-S-E	4261	13	4	2.89	0.54
	AS-S-FE	2520	6	0	0.52	0
	AS-SE-W	18606	96	18	34.63	32.37
	AS-SE-E	14037	41	13	51.59	50.82
Oceania	OC	2190	24	1	1.74	0.46
