# Supplementary material for: Understanding the global rise of artemisinin resistance: Insights from over 100,000 Plasmodium falciparum samples
Source: eLife. 2025 Oct 2;14:e105544. doi: 10.7554/eLife.105544 (PMC12490857; doi:10.7554/eLife.105544)
Supplement: Supplementary file 4. [file elife-105544-supp4.xlsx]

## Sheet: Sheet1
Supplementary File 4. Proportion of total samples per year from each population.
Year	South America	West Africa	Central Africa	North Africa	Northeast Africa	East Africa	Southern Africa	Western Asia	Eastern South Asia	Far-Eastern South Asia	Western Southeast Asia	Eastern Southeast Asia	Oceania	Total Samples
1980	0	0	0	0	0	0	0	0	0	0	0	0	100	13
1984	0	100	0	0	0	0	0	0	0	0	0	0	0	69
1987	0	0	0	0	0	0	0	0	0	0	0	0	100	6
1990	0	100	0	0	0	0	0	0	0	0	0	0	0	8
1991	0	5.26	0	0	0	0	0	0	0	0	94.74	0	0	38
1993	0	0	0	0	0	0	0	0	0	0	0	100	0	5
1995	0	0	0	0	0	100	0	0	0	0	0	0	0	168
1996	0	0	0	0	0	51.19	0	0	0	0	0	0	48.81	84
1997	0	0	0	0	0	23.4	0	0	0	0	40.43	36.17	0	94
1998	0	0	0	0	0	63.93	0	0	0	0	0	0	36.07	305
1999	4.26	0	0	0	93.95	0.14	0	0	0	0	0	1.65	0	727
2000	0	0	0	0	0	78.31	0	0	0	0	0	21.69	0	83
2001	0	14.47	64.15	0	0	0	0	0	0	0	21.38	0	0	159
2002	0	21.95	0	0	0	0	0	0	0	0	30.73	47.32	0	410
2003	6.04	37.74	0	0	0	7.55	9.43	0	0	0	25.28	2.64	11.32	530
2004	0	12.08	30.72	0	0	6.8	0	0	0	0	37.51	12.9	0	853
2005	0	5.71	9.19	0	8.08	24.56	0	0	0	0	37.08	15.37	0	631
2006	0	11.92	44.77	0	0	19.62	0	0	0	0	8.43	15.26	0	688
2007	0	22.62	13.23	0	3.17	16.05	0	0	0	1.56	41.44	1.92	0	2237
2008	35.45	4.69	0	0	3.65	1.56	0	0	0	0.57	36.73	11.61	5.73	2110
2009	0.74	23.2	0	0	0	9.43	0	0	6.77	3.46	29.6	25.77	1.03	1358
2010	3.37	31.2	1.41	0	4.92	13.36	1.72	0	11.5	0	9.37	22.31	0.83	2904
2011	0.51	12.3	0	0	4.45	11.28	0.15	0	3.34	7.37	14.31	45.77	0.51	5276
2012	12.15	15.32	1.84	0	5.14	12.62	4.29	0	3.65	1.85	15.17	26.27	1.69	8248
2013	2.45	33.15	5.69	0.02	3.95	13.14	0.58	2.12	2.84	2.86	14.55	17.35	1.29	9335
2014	2.03	38.72	12.34	0.04	6.29	11.92	4.49	0	5.33	2.03	12.44	3.9	0.46	17980
2015	2.43	23.2	0.92	0	4.51	5.09	7.11	0	5.82	3.12	32.91	13.34	1.56	13686
2016	12.23	28.76	5.73	0	7.85	7.68	3.14	1.01	2.9	6.61	11.49	5.31	7.3	10825
2017	3.17	13.4	12.49	0	7.57	14.81	2.43	3.64	5.17	0.12	22.81	11.69	2.71	10235
2018	1.56	24.42	13.06	0	11.22	9.44	8.2	1.26	2.58	0.15	14.73	13.32	0.07	9626
2019	0	4.18	18.84	0	21.99	12.58	29.12	3.49	3.02	0.33	1.82	4.63	0	8189
2020	0	0.05	16.44	0	75.29	0	0	0	0	2.63	0	0	5.59	2165
2021	0	0	41.7	0	36.01	7.81	13.4	0	0	0	0	0	1.08	2216
2022	0	13.71	17.55	0	68.75	0	0	0	0	0	0	0	0	1459
2023	0	0	0	0	0	100	0	0	0	0	0	0	0	213
