# Supplementary material for: Understanding the global rise of artemisinin resistance: Insights from over 100,000 Plasmodium falciparum samples
Source: eLife. 2025 Oct 2;14:e105544. doi: 10.7554/eLife.105544 (PMC12490857; doi:10.7554/eLife.105544)
Supplement: Supplementary file 5. [file elife-105544-supp5.xlsx]

## Sheet: Sheet1
Supplementary File 5. Summary statistics from logistic regression analysis of ART-R transmission in selected countries.
Continent	Country	Year Range	Max Slope (%) - CI	Year of Max Slope	R2	Years > 2%	First Year > 2%	Total Samples	Model Frequency for Last Observed Year	Raw Frequency for Last Observed year
Asia	Cambodia	2002-2019	4.18 (2.33-6.03)	2008	0.63	16	2002	6189	86.24	52.16
Asia	Laos	2010-2018	5.59 (2.95-8.23)	2017	0.22	6	2012	2644	51.7	37.91
Asia	Myanmar	2004-2019	2.9 (1.58-4.22)	2018	0.44	14	2004	11868	51.51	61.07
Asia	Thailand	1991-2017	6.33 (0-14.5)	2012	0.78	16	1997	5599	75.38	67.5
Asia	Vietnam	2005-2019	5.45 (2.89-8.02)	2013	0.64	13	2005	4557	75.78	75.81
Africa	Eritrea	2013-2019	5.5 (0-12.25)	2019	0.93	2	2016	1548	15.67	15.3
Africa	Rwanda	2010-2023	3.25 (0-7.44)	2023	0.89	4	2015	2153	18.03	17.37
Africa	Sudan	2014-2020	0.88 (0-2.06)	2020	0.45	1	2020	1108	2.15	2.27
Africa	Tanzania	2003-2021	40.78 (0-118.81)	2021	1	1	2021	3908	22.54	22.54
Africa	Uganda	1999-2022	9.12 (0-25.13)	2022	0.96	6	2017	7752	28.82	25.72
Oceania	Papua New Guinea	1998-2020	3.08 (0-8.69)	2020	0.53	2	2012	1401	6.32	6.38
