# Supplementary material for: Understanding the global rise of artemisinin resistance: Insights from over 100,000 Plasmodium falciparum samples
Source: eLife. 2025 Oct 2;14:e105544. doi: 10.7554/eLife.105544 (PMC12490857; doi:10.7554/eLife.105544)
Supplement: Supplementary file 6. [file elife-105544-supp6.xlsx]

## Sheet: Sheet1
Supplementary File 6. Summary of TES for artemisinin combination therapies in Africa that has reported delayed clearance rate or treatment failure rate above 10%.
Reference	Year	Country, Site	Population	No. of samples with delayed clearance*	Delayed clearance (%)	No. of samples with treatment failure**	Treatment failure %(KM)	Association with K13 alleles and outcome	Association with Pfmdr1 alleles and outcome
Artemether-Lumefantrine
Plucinski MM, Dimbu PR, Macaia AP, Ferreira CM, Samutondo C, Quivinja J, et al. Efficacy of artemether–lumefantrine, artesunate–amodiaquine, and dihydroartemisinin–piperaquine for treatment of uncomplicated Plasmodium falciparum malaria in Angola, 2015. Malar J. 2017 Feb 2;16:62.	2015	Angola,	Southern Africa	1	1	8	11.9	Not found	pfmdr1 NYD and NFD haplotypes found in %91 of treatment failures
		Zaire
Dimbu PR, Horth R, Cândido ALM, Ferreira CM, Caquece F, Garcia LEA, et al. Continued Low Efficacy of Artemether-Lumefantrine in Angola in 2019. Antimicrob Agents Chemother. 2021 Jan 20;65(2):e01949-20.	2019	Angola,		0	0	13	12.4	Not found	N86 pfmdr1 allele found in 97% of treatment failures
		Lunda Sul
Dimbu PR, Labuda S, Ferreira CM, Caquece F, André K, Pembele G, et al. Therapeutic response to four artemisinin-based combination therapies in Angola, 2021. Antimicrob Agents Chemother. 2024 Feb 29;68(4):e01525-23.	2021	Angola,		0	0	10	12	Not tested	Not tested
		Zaire
Westercamp N, Owidhi M, Otieno K, Chebore W, Buff AM, Desai M, et al. Efficacy of Artemether-Lumefantrine and Dihydroartemisinin-Piperaquine for the Treatment of Uncomplicated Plasmodium falciparum Malaria among Children in Western Kenya, 2016 to 2017. Antimicrob Agents Chemother. 2022 Sep 20;66(9):e0020722.	2016	Kenya,	Northeast Africa	1	0.7	16	13.5	Not found	Not found
		Siaya
								.
Gansané A, Moriarty LF, Ménard D, Yerbanga I, Ouedraogo E, Sondo P, et al. Anti-malarial efficacy and resistance monitoring of artemether-lumefantrine and dihydroartemisinin-piperaquine shows inadequate efficacy in children in Burkina Faso, 2017–2018. Malar J. 2021 Jan 19;20(1):48.	2017	Burkina Faso,	West Africa	1	0.9	22	26.5	Not found	Not found
		Nanoro
Moriarty LF, Nkoli PM, Likwela JL, Mulopo PM, Sompwe EM, Rika JM, et al. Therapeutic Efficacy of Artemisinin-Based Combination Therapies in Democratic Republic of the Congo and Investigation of Molecular Markers of Antimalarial Resistance. Am J Trop Med Hyg. 2021 Oct 6;105(4):1067–75.	2018	DRC, Mikalayi	Central Africa	0	0	14	14	Not found	Certain pfmdr1 and pfcrt genotypes associated with treatment outcome.
Straimer J, Gandhi P, Renner KC, Schmitt EK. High Prevalence of Plasmodium falciparum K13 Mutations in Rwanda Is Associated With Slow Parasite Clearance After Treatment With Artemether-Lumefantrine. J Infect Dis. 2022 Apr 19;225(8):1411–4.		Rwanda, Kigali and Gasabo		5	27.8	1	5.6	K13 alleles associated with delayed clearance.	Not tested
Ebong C, Sserwanga A, Namuganga JF, Kapisi J, Mpimbaza A, Gonahasa S, et al. Efficacy and safety of artemether-lumefantrine and dihydroartemisinin-piperaquine for the treatment of uncomplicated Plasmodium falciparum malaria and prevalence of molecular markers associated with artemisinin and partner drug resistance in Uganda. Malar J. 2021 Dec 24;20(1):484.		Uganda,	Northeast Africa	0	0	10	12.8	Not found	Not found
		Busia
Ishengoma DS, Mandara CI, Bakari C, Fola AA, Madebe RA, Seth MD, et al. Evidence of artemisinin partial resistance in North-western Tanzania: clinical and drug resistance markers study. medRxiv. 2024. doi:10.1101/2024.01.31.24301954.	2022	Tanzania, Karagwe	East Africa	11	12.5	1	1.7	561H mutation was significantly associated with delayed clearance.	Not found
Artesunate-Amodiaquine
National Malaria	2019	Eritrea	Northeast Africa	9	10.2	4	4.7	Not tested	Not tested
Control
Program***
Ishengoma DS, Mandara CI, Bakari C, Fola AA, Madebe RA, Seth MD, et al. Evidence of artemisinin partial resistance in North-western Tanzania: clinical and drug resistance markers study. medRxiv. 2024. doi:10.1101/2024.01.31.24301954.	2022	Tanzania, Karagwe	East Africa	17	19.3	0	0	561H mutation was significantly associated with delayed clearance.	Not found
Dihydroartemisinin–Piperaquine
Gansané A, Moriarty LF, Ménard D, Yerbanga I, Ouedraogo E, Sondo P, et al. Anti-malarial efficacy and resistance monitoring of artemether-lumefantrine and dihydroartemisinin-piperaquine shows inadequate efficacy in children in Burkina Faso, 2017–2018. Malar J. 2021 Jan 19;20(1):48.	2018	Burkina Faso,	West Africa	4	3.5	14	16.4	Not found	Not found
		Gourcy
		Burkina Faso,		2	1.8	9	11.3	Not found	Not found
		Nanoro
*Delayed clearance has been defined as samples with parasitemia on day 3
**Treatment failure has been defined as PCR corrected efficacy based on Kaplan–Meier estimate.
***Data is obtained from Malaria Threats Map (63).
