# Supplementary material for: Understanding the global rise of artemisinin resistance: Insights from over 100,000 Plasmodium falciparum samples
Source: eLife. 2025 Oct 2;14:e105544. doi: 10.7554/eLife.105544 (PMC12490857; doi:10.7554/eLife.105544)
Supplement: Supplementary file 7. — The number of countries in each population using each regimen for 1460 uncomplicated malaria. Abbreviations: A – artemether, L – lumefantrine, AS – artesunate, 1461 AQ – amodiaquine, MQ – mefloquine, DHA – dihydroartemisinin, PYR – pyronaridine, CQ – 1462 chloroquine, PPQ – piperaquine, PQ – primaquine. [file elife-105544-supp7.xlsx]

## Sheet: Sheet1
Supplementary File 7. National adoption of first-line ACT regimens in different populations by the end of 2022. The table shows the number of countries in each population that adopted each ACT regimen for the treatment of uncomplicated, unconfirmed, or confirmed falciparum malaria, according to the WHO (2023). Some countries have multiple first-line ACTs available for use and included in the tabl…
Population	AL	AS-AQ	DHA-PPQ	AS-PYR	AL+PQ	AS+SP+PQ	AS+MQ	AS+MQ+PQ	DHA-PPQ+PQ	AS-PYR+PQ
	Double ACTs				Triple ACTs
South America (9)	2	0	0	0	5	0	0	1	0	0
West Africa (18)	16	1	0	0	1	0	0	1	0	0
Central Africa (5)	4	3	0	0	0	0	0	0	0	0
East Africa (8)	6	1	0	0	1	0	0	0	0	0
Northeast Africa (7)	3	2	0	0	2	0	0	0	0	0
Southern Africa (5)	5	1	0	0	0	0	0	0	0	0
Western Asia (3)	2	0	0	0	1	0	0	0	0	0
Eastern South Asia (1)	0	0	0	0	1	1	0	0	0	0
Far-Eastern South Asia (2)	1	0	0	0	2	0	0	0	0	0
Eastern Southeast Asia (5)	1	0	1	1	2	0	1	0	0	0
Western Southeast Asia (2)	0	0	0	0	1	0	0	0	1	1
Oceania (4)	2	0	1	0	1	0	0	0	0	0
