# Supplementary material for: Understanding the global rise of artemisinin resistance: Insights from over 100,000 Plasmodium falciparum samples
Source: eLife. 2025 Oct 2;14:e105544. doi: 10.7554/eLife.105544 (PMC12490857; doi:10.7554/eLife.105544)
Supplement: Supplementary file 8. [file elife-105544-supp8.xlsx]

## Sheet: Sheet1
Supplementary File 8. Description of columns in Source Data S1.csv, which contains kelch13 marker and metadata for 112,933 samples, released with the Balmer et al. (2025). Each row represents a sample; each column represents a metavariable as described below.
Column Name	Description
Sample	Unique sample identification number.
Country	Country in which the sample was collected.
Population	Population of the country where sample was collected. These are SA (South America), AF-N (North Africa), AF-W (West Africa), AF-C (Central Africa), AF-NE (Northeastern Africa), AF-E (Eastern Africa), AF-S (Southern Africa),
	AS-S-E (Eastern South Asia), AS-S-FE (Far-Eastern South Asia), AS-SE-W (Western Southeast Asia), AS-SE-E (Eastern Southeast Asia), and OC (Oceania).
Year	Year of collection for this sample.
Marker	Nonsynonymous amino acid change detected in kelch13
	BTB/POZ and propeller domains at codon positions 349-726.
Continent	Continent where the sample was collected.
Source	Source of the data for this sample. This is either a publication, or Pf7 (MalariaGEN).
Sequencing Method	Method used for sequencing of the propeller region of kelch13.
