# Supplementary material for: Understanding the global rise of artemisinin resistance: Insights from over 100,000 Plasmodium falciparum samples
Source: eLife. 2025 Oct 2;14:e105544. doi: 10.7554/eLife.105544 (PMC12490857; doi:10.7554/eLife.105544)
Supplement: Supplementary file 9. [file elife-105544-supp9.xlsx]

## Sheet: Sheet1
Supplementary File 9. Description of columns in Source Data S2.csv, which contains count of kelch13 markers in 13 populations, released with the Balmer et al. (2025). Each row represents a marker; each column represents a population described below.
SA	South America
AF-W	West Africa
AF-C	Central Africa
AF-N	North Africa
AF-NE	Northeast Africa
AF-E	East Africa
AF-S	Southern Africa
AS-W	Western Asia
AS-S-E	Eastern South Asia
AS-S-FE	Far-Eastern South Asia
AS-SE-W	Western Southeast Asia
AS-SE-E	Eastern Southeast Asia
OC	Oceania
Total	Total number of samples with each marker
